# Supplementary material for: A nation-wide retrospective epidemiological study of gastroenteropancreatic neuroendocrine neoplasms in china
Source: PubMed Central journal article supplement (PMC5641082; doi:10.18632/oncotarget.17599), 2017-05-03
Supplement: oncotarget-08-71699-s001.pdf [file oncotarget-08-71699-s001.pdf]

# A nation-wide retrospective epidemiological study of gastroenteropancreatic neuroendocrine neoplasms in china

## SUPPLEMENTARY MATERIALS

### SUPPLEMENTARY FIGURE

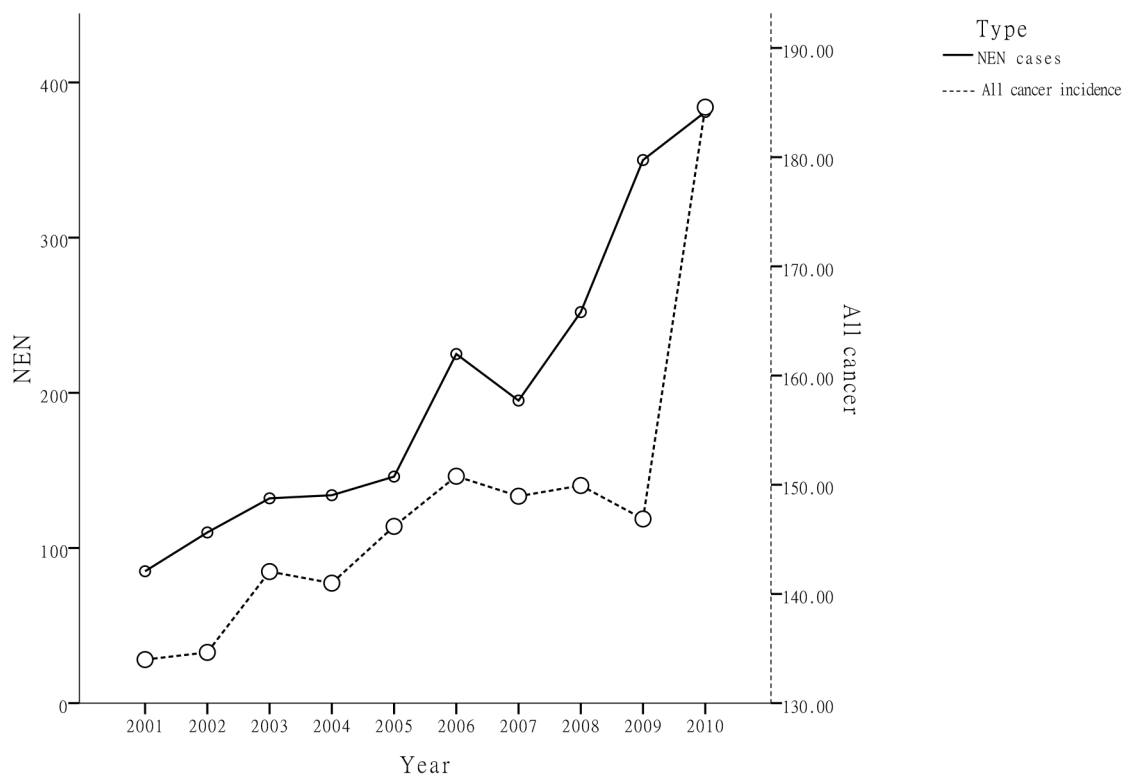

Supplementary Figure 1: GEP-NEN case increase comparing with Chinese cancer incidence in 2001-2010.
